# Supplementary material for: Risk Perceptions, Knowledge and Behaviors of General and High-Risk Adult Populations Towards COVID-19: A Systematic Scoping Review
Source: PubMed Central journal article supplement (PMC8636827; doi:10.3389/phrs.2021.1603979), 2021-11-15
Supplement: DataSheet1.pdf [file DataSheet1.pdf]

## Appendix 1: Search strategy in Ovid-MEDLINE

1. exp coronavirus infections/
2. (betacoronavirus\* or coronavirus\* or corona virus\*). mp
3. 1 or 2
4. exp china/
5. (china or chinese or hubei or wuhan).af.
6. 4 or 5
7. 3 and 6
8. (betacoronavirus\* or coronavirus\* or corona virus\*).ti,kf.
9. Severe acute respiratory syndrome coronavirus 2 or "SARS CoV-2" or "SARSCoV 2" or SARSCoV2 or cov2 or "sars 2" or COVID or "coronavirus 2" or covid19 or ncov or ((novel or new) adj3 coronavirus) or ncp). mp.
10. 8 or 9
11. Exp pneumonia/
12. Pneumonia.mp.
13. 11 or 12
14. Wuhan.af.
15. 13 or 14
16. 7 or 10 or 15
17. (percept\* or perceiv\* or representat\* or aware\* or conscious\*).kf,tw.
18. (knowledge or understand\* or comprehens\*). kf,tw.
19. (behavior\* or behaviour\* or action\* or attitude\* or practic\*).kf,tw.
20. (population\* or person\* or people or invidual\* or adult\* or citizen\* or resident\* or public or communit\* or group\*). kf,tw.
21. 17 or 18 or 19
22. 16 and 20 and 21
23. Limit to 22 (english language and humans and yr="2020-current")

The 23 step MEDLINE strategy yielded 2439 references.
